# Supplementary material for: Evaluating the Causal Association Between Educational Attainment and Asthma Using a Mendelian Randomization Design
Source: Front Genet. 2021 Aug 9;12:716364. doi: 10.3389/fgene.2021.716364 (PMC8381375; doi:10.3389/fgene.2021.716364)
Supplement: Supplementary file 1 [file Table_1.XLSX]

## Sheet: Sheet1
Table 1 162 independent genetic variants associated with educational attainment reaching genome-wide significance (P < 5×10-8)
SNP	CHR	Position (b37)	EA	NEA	EAF	Beta	SE	P value	Variance
rs11130222	3	49901060	A	T	0.59	0.025	0.0023	3.68e-28	0.0003
rs13090388	3	49391082	T	C	0.31	0.026	0.0024	2.58e-26	0.00028
rs7029201	9	23358081	A	G	0.41	0.025	0.0023	7.16e-27	0.0003
rs9401593	6	98549801	A	C	0.52	-0.024	0.0022	3.83e-28	0.0003
rs12987662	2	100821548	A	C	0.39	0.025	0.0023	8.52e-28	0.0003
rs8002014	13	58358159	A	G	0.27	-0.024	0.0025	3.8e-21	0.00022
rs34305371	1	72733610	A	G	0.1	0.036	0.0039	1.52e-20	0.00023
rs10773002	12	123746961	A	T	0.25	0.022	0.0026	7.74e-18	0.00018
rs6882046	5	87968864	A	G	0.74	-0.019	0.0025	8.12e-14	0.00014
rs17824247	2	144152539	T	C	0.59	-0.016	0.0023	2.41e-12	0.00012
rs61160187	5	60111579	A	G	0.61	-0.017	0.0023	2.71e-14	0.00014
rs11588857	1	204587047	A	G	0.21	0.02	0.0027	3.27e-13	0.00013
rs2456973	12	56416928	A	C	0.67	-0.019	0.0024	5.83e-16	0.00016
rs10786662	10	103989812	C	G	0.55	-0.017	0.0022	4.63e-14	0.00014
rs4863692	4	140764124	T	G	0.32	0.017	0.0024	4.61e-12	0.00012
rs10223052	5	60800336	A	G	0.36	0.016	0.0023	3.56e-12	0.00012
rs11998763	9	1787687	A	G	0.54	0.017	0.0022	4.61e-14	0.00014
rs9964724	18	35159124	T	C	0.68	0.018	0.0024	2.39e-14	0.00014
rs6839705	4	106144735	A	C	0.36	0.015	0.0023	1.19e-10	0.0001
rs7964899	12	14595756	A	G	0.44	0.016	0.0022	4.37e-13	0.00013
rs12410444	1	44188719	A	G	0.7	-0.017	0.0024	6.01e-13	0.00013
rs112634398	3	50075494	A	G	0.95	0.038	0.0055	2.74e-12	0.00014
rs1106761	8	142619234	A	G	0.38	-0.016	0.0023	1.37e-11	0.00011
rs3172494	3	48731487	T	G	0.12	0.023	0.0036	8.98e-11	0.00011
rs58694847	14	84916511	C	G	0.26	-0.018	0.0025	4.98e-12	0.00012
rs1008078	1	91189731	T	C	0.4	-0.017	0.0023	3.1e-14	0.00014
rs34344888	14	23387585	A	G	0.39	-0.016	0.0023	8.87e-13	0.00013
rs1378214	15	47579004	T	C	0.37	-0.015	0.0023	1.85e-11	0.00011
rs16845580	2	161920884	T	C	0.63	0.016	0.0023	4.14e-12	0.00012
rs12900061	15	66009248	A	G	0.18	0.019	0.0029	5.04e-11	0.00011
rs35771425	1	211609768	T	C	0.79	0.018	0.0027	2.71e-11	0.00011
rs7776010	6	14723608	T	C	0.82	-0.021	0.003	2.61e-12	0.00013
rs1338554	6	98346801	A	G	0.5	0.015	0.0022	1.52e-11	0.00011
rs356992	2	60753593	C	G	0.3	0.017	0.0024	4.03e-12	0.00012
rs7593947	2	60704933	A	T	0.51	0.015	0.0022	2.39e-11	0.00011
rs1912528	4	140945966	T	C	0.36	0.014	0.0023	1.53e-09	9e-05
rs2992632	1	243503764	A	T	0.72	0.016	0.0025	3.25e-11	0.00011
rs4741351	9	14222782	A	G	0.3	-0.015	0.0024	2.98e-10	0.0001
rs6715849	2	100306378	A	G	0.44	-0.015	0.0022	1.65e-11	0.00011
rs660001	5	113866598	A	G	0.21	-0.018	0.0027	1.34e-10	0.0001
rs320700	7	137049477	A	G	0.65	0.014	0.0023	3.91e-09	9e-05
rs113474297	5	60554934	T	C	0.13	-0.021	0.0034	8.34e-10	0.0001
rs28420834	15	82513121	A	G	0.45	-0.014	0.0023	2.67e-10	0.0001
rs56231335	6	98187291	T	C	0.67	-0.017	0.0024	7.17e-13	0.00013
rs62263923	3	85674790	A	G	0.64	-0.017	0.0023	1.11e-13	0.00014
rs12076635	1	44026656	C	G	0.79	0.018	0.0027	3.11e-11	0.00011
rs9556958	13	99100046	T	C	0.53	-0.015	0.0022	1.21e-11	0.00011
rs8049439	16	28837515	T	C	0.59	0.015	0.0023	6.99e-11	0.00011
rs11774212	8	145686505	T	C	0.52	0.016	0.0023	1.51e-12	0.00013
rs10483349	14	29629456	A	G	0.81	-0.017	0.0028	7.11e-10	9e-05
rs71326918	3	50174844	A	C	0.1	0.022	0.0039	1.02e-08	9e-05
rs11687170	2	237058144	T	C	0.83	0.021	0.0035	1.39e-09	0.00013
rs7286601	22	51121416	T	G	0.54	-0.014	0.0023	1.99e-09	9e-05
rs73344830	10	103816828	A	G	0.42	0.015	0.0023	9.93e-12	0.00012
rs12143094	1	72105376	C	G	0.06	0.029	0.0049	2.73e-09	0.0001
rs34638686	3	48682658	T	C	0.1	0.023	0.0038	1.51e-09	0.0001
rs10761741	10	65066186	T	G	0.42	0.013	0.0023	7.05e-09	8e-05
rs75090987	5	104042643	A	C	0.52	0.014	0.0022	1.14e-09	9e-05
rs4500960	2	162818621	T	C	0.46	-0.014	0.0022	2.56e-10	0.0001
rs1562242	5	57566494	T	C	0.48	-0.013	0.0022	5.95e-09	8e-05
rs192818565	17	43991515	T	G	0.8	0.02	0.0029	2.02e-12	0.00013
rs12534506	7	92662327	A	T	0.47	-0.014	0.0023	3.17e-10	0.0001
rs10178115	2	155451738	T	G	0.54	0.014	0.0022	5.84e-10	0.0001
rs62100765	18	50735418	T	C	0.42	-0.015	0.0023	1.08e-10	0.0001
rs12142680	1	73615892	A	G	0.09	0.026	0.0043	8.97e-10	0.00011
rs71413877	2	100924822	A	G	0.04	0.035	0.0058	1.91e-09	0.0001
rs149613931	10	103550281	T	G	0.06	-0.028	0.0048	5.54e-09	8e-05
rs17167170	7	133302345	A	G	0.8	0.019	0.0028	1.79e-12	0.00012
rs12956009	18	44768024	T	C	0.57	-0.013	0.0022	3.75e-09	9e-05
rs2179152	6	26325888	T	C	0.37	-0.013	0.0023	9.3e-09	8e-05
rs7033137	9	72055158	C	G	0.76	0.015	0.0026	1.77e-08	8e-05
rs4378243	1	98395881	T	G	0.83	0.018	0.0029	1.04e-09	9e-05
rs4493682	5	45188024	C	G	0.17	0.019	0.003	1.54e-10	0.0001
rs9755467	3	127143885	T	C	0.16	0.019	0.0031	5.11e-10	0.0001
rs4851251	2	100753490	T	C	0.27	-0.015	0.0025	1.36e-09	9e-05
rs7945718	11	12748819	A	G	0.62	0.014	0.0023	1.26e-09	9e-05
rs1382358	19	13171424	T	C	0.87	0.02	0.0035	1.66e-08	9e-05
rs148490894	7	99531755	A	G	0.98	0.044	0.0078	1.84e-08	9e-05
rs12761761	10	133775375	T	C	0.24	0.016	0.0027	1.04e-08	9e-05
rs142328051	1	44371441	T	C	0.91	0.022	0.0039	3.6e-08	8e-05
rs55786114	3	48982335	T	C	0.07	-0.03	0.0045	4.11e-11	0.00012
rs7948975	11	90424638	T	C	0.64	0.014	0.0023	1.14e-09	9e-05
rs1606974	2	51873599	A	G	0.12	0.022	0.0034	1.82e-10	0.0001
rs10772644	12	13417617	C	G	0.88	0.02	0.0035	1.65e-08	8e-05
rs111321694	11	110950386	T	C	0.17	-0.016	0.003	4.33e-08	7e-05
rs17425572	9	88006338	A	G	0.46	0.014	0.0022	1.38e-09	9e-05
rs111730030	19	13268826	T	G	0.06	-0.029	0.005	7.51e-09	9e-05
rs1550973	11	131291728	A	G	0.35	-0.014	0.0023	2e-09	9e-05
rs2406253	7	100077273	A	G	0.81	0.016	0.0028	4.64e-08	8e-05
rs7772172	6	16662928	A	G	0.4	0.013	0.0023	9.83e-09	8e-05
rs281302	15	47686662	A	G	0.56	-0.013	0.0022	2.88e-09	9e-05
rs17372140	1	98572382	A	G	0.3	-0.014	0.0024	9.19e-09	8e-05
rs12640626	4	176626272	A	G	0.58	0.013	0.0023	1.66e-08	8e-05
rs113011189	3	49250007	T	C	0.09	-0.025	0.0045	2.91e-08	0.0001
rs56081191	6	98557732	A	G	0.07	0.028	0.0047	3.67e-09	0.0001
rs12694681	2	226609241	T	G	0.69	0.014	0.0024	1.81e-08	8e-05
rs12134151	1	96202443	C	G	0.5	-0.013	0.0022	1.14e-08	8e-05
rs7914680	10	67965010	T	G	0.71	-0.014	0.0025	1.6e-08	8e-05
rs6493271	15	47613593	T	C	0.83	0.017	0.0029	4.21e-09	9e-05
rs152603	5	106774922	A	G	0.65	-0.013	0.0023	2.01e-08	8e-05
rs7791133	7	135237096	A	C	0.38	-0.014	0.0023	2.33e-09	9e-05
rs1389473	12	92154270	A	G	0.38	-0.013	0.0023	4.52e-09	8e-05
rs61874768	10	103880118	T	G	0.18	-0.016	0.0029	3.85e-08	8e-05
rs10818606	9	124618386	T	C	0.4	-0.014	0.0023	5.67e-10	0.0001
rs2568955	1	72762169	T	C	0.25	-0.016	0.0026	5.77e-10	0.0001
rs268134	2	65608363	A	G	0.25	0.014	0.0026	3.53e-08	8e-05
rs6939294	6	16950631	T	C	0.23	0.016	0.0026	2.9e-09	9e-05
rs12653396	5	87847273	A	T	0.56	-0.013	0.0022	7.65e-09	8e-05
rs648163	1	199315998	T	C	0.26	0.014	0.0025	1.38e-08	8e-05
rs140711597	3	48469441	C	G	0.98	0.052	0.0091	1.66e-08	0.0001
rs301800	1	8490603	T	C	0.18	0.016	0.0029	2.85e-08	8e-05
rs12462428	19	16694610	T	C	0.81	0.016	0.0028	3.31e-08	8e-05
rs11756123	6	152218079	A	T	0.35	-0.015	0.0023	6.43e-11	0.00011
rs7429990	3	47901803	A	C	0.27	-0.015	0.0026	8.44e-09	8e-05
rs12702087	7	44812607	A	G	0.46	0.013	0.0022	1.74e-09	9e-05
rs4076457	15	78007213	T	C	0.25	0.015	0.0026	8.85e-09	8e-05
rs78387210	20	47823441	T	C	0.09	0.023	0.004	8.41e-09	9e-05
rs7610856	3	71579022	A	C	0.43	0.012	0.0023	3.02e-08	8e-05
rs78365243	1	211737950	T	C	0.95	0.029	0.0052	2.22e-08	8e-05
rs1115240	14	27090388	C	G	0.75	-0.016	0.0026	7.05e-10	9e-05
rs7605827	2	15598740	A	T	0.29	0.016	0.0029	4.86e-08	0.0001
rs76076331	2	10977585	T	C	0.14	0.02	0.0032	2.38e-10	0.0001
rs1596747	2	193802478	A	G	0.51	0.014	0.0022	1.14e-09	9e-05
rs77702819	2	101328728	T	G	0.09	0.022	0.004	2.93e-08	8e-05
rs12646808	4	3249828	T	C	0.66	0.015	0.0024	3.79e-10	0.0001
rs2624818	3	50056265	A	G	0.11	0.021	0.0037	8.63e-09	9e-05
rs7633857	3	160844942	C	G	0.52	-0.014	0.0026	4.74e-08	0.0001
rs11976020	7	72247800	A	G	0.23	-0.015	0.0027	4.43e-08	7e-05
rs4308415	4	67821874	C	G	0.44	-0.013	0.0022	2.52e-09	9e-05
rs700590	5	88106258	T	C	0.59	-0.013	0.0023	2.84e-08	8e-05
rs756912	7	71741797	T	C	0.52	-0.014	0.0022	1.14e-09	9e-05
rs7241530	18	75907992	T	C	0.36	-0.013	0.0023	2.28e-08	8e-05
rs35971989	3	51469248	A	G	0.84	0.018	0.0032	2.95e-08	8e-05
rs11771168	7	113904061	T	C	0.24	-0.015	0.0027	2.56e-08	8e-05
rs17504614	2	51080481	T	C	0.8	0.016	0.0028	1.56e-08	8e-05
rs9914544	17	18787828	A	C	0.62	-0.013	0.0023	4.66e-08	8e-05
rs4675248	2	202880230	A	G	0.4	-0.012	0.0023	4.39e-08	7e-05
rs6800916	3	50052873	A	T	0.08	-0.024	0.0043	1.7e-08	9e-05
rs35532491	22	34329603	A	T	0.9	-0.022	0.0038	7.15e-09	9e-05
rs56044892	1	41830086	T	C	0.2	-0.016	0.0028	5.37e-09	9e-05
rs79925071	11	121998253	T	G	0.56	0.013	0.0022	1.52e-08	8e-05
rs12145291	1	74161795	T	C	0.94	-0.029	0.0051	2.21e-08	9e-05
rs34106693	2	101151830	C	G	0.83	0.017	0.0031	1.8e-08	8e-05
rs12754946	1	77989923	T	C	0.57	0.013	0.0023	1.48e-08	8e-05
rs4741343	9	14075095	A	G	0.18	-0.016	0.0029	2.32e-08	8e-05
rs76878669	11	66092567	C	G	0.76	0.014	0.0026	4.12e-08	7e-05
rs775326	5	62918416	A	C	0.32	-0.014	0.0024	1.22e-08	8e-05
rs10821136	9	96238731	T	C	0.34	0.013	0.0024	3.58e-08	8e-05
rs1925576	10	68689083	A	G	0.54	-0.012	0.0022	2.23e-08	8e-05
rs6065080	20	59832791	T	C	0.36	-0.013	0.0023	1.16e-08	8e-05
rs56158183	2	60632924	A	G	0.07	0.025	0.0043	1.42e-08	8e-05
rs12531458	7	39090698	A	C	0.52	0.012	0.0022	3.81e-08	7e-05
rs62379838	5	120102028	T	C	0.69	0.013	0.0024	4.06e-08	7e-05
rs7590368	2	10961474	T	C	0.73	-0.014	0.0025	2.72e-08	8e-05
rs113520408	7	128402782	A	G	0.27	0.015	0.0025	7.15e-09	9e-05
rs62263033	3	48370424	T	C	0.96	0.037	0.0063	5.6e-09	9e-05
rs11643654	16	51183728	A	C	0.6	0.013	0.0023	2e-08	8e-05
rs10930008	2	161854736	A	G	0.73	-0.014	0.0025	4.14e-08	7e-05
rs56262138	3	86183716	A	T	0.3	0.014	0.0025	2.29e-08	8e-05
rs113779084	7	11871787	A	G	0.31	0.014	0.0024	2.7e-08	8e-05
rs62262721	3	49768927	T	C	0.96	0.042	0.0072	3.41e-09	0.00013
rs1967109	4	28720915	A	G	0.15	-0.017	0.0031	4.4e-08	7e-05
CHR, Chromosome; EA, Effect Allele; NEA, Non-Effect Allele; EAF, Effect Allele Frequency; SE, standard error; Beta is the regression coefficients based on the effect allele.
